# Supplementary material for: Controllable synthesis of porous TiO2with a hierarchical nanostructure for efficient photocatalytic hydrogen evolution
Source: Royal Society of Chemistry journal article supplement (doi:10.1039/c4ta04182h), 2014-09-24
Supplement: c4ta04182h1.pdf [file c4ta04182h1.pdf]

## Supporting Information

# Controllable synthesis of porous TiO<sub>2</sub> with hierarchical nanostructure for efficient photocatalytic hydrogen evolution

Lin Wang, Zhongyuan Nie, Chuanbao Cao\*, Muwei Ji, Li Zhou and Xiao Feng

Research Center of Materials Science, Beijing Institute of Technology, Beijing 100081, China, E-mail: cbcao@bit.edu.cn

Table S1. Photocatalytic H<sub>2</sub> evolution

| Material         | Cocatalyst            | Light source <sup>a</sup> | Reaction solution <sup>b</sup> | H <sub>2</sub> Activity (μmol g <sup>-1</sup> h <sup>-1</sup> ) | Reference (year) |
|------------------|-----------------------|---------------------------|--------------------------------|-----------------------------------------------------------------|------------------|
| TiO <sub>2</sub> | Pt                    | UV-Vis (H) 150 W          | TEOA                           | 3667                                                            | 1 (2012)         |
| TiO <sub>2</sub> | Au                    | UV-Vis (Hg) 300 W         | Methanol                       | 2785                                                            | 2 (2005)         |
| TiO <sub>2</sub> | Rh                    | Hg 500 W                  | water vapor                    | 449                                                             | 3 (1985)         |
| TiO <sub>2</sub> | CuO                   | UV-Vis (Hg) 400 W         | Methanol                       | 18 500                                                          | 4 (2009)         |
| TiO <sub>2</sub> | Cu(OH) <sub>2</sub>   | UV-Vis (Hg) 400 W         | Methanol                       | 14 940                                                          | 5 (2013)         |
| TiO <sub>2</sub> | Ni(OH) <sub>2</sub>   | 365 nm (LED) 3 W          | Methanol                       | 3056                                                            | 6 (2011)         |
| TiO <sub>2</sub> | C <sub>60</sub> -CNT  | UV-Vis (Xe) 300 W         | TEOA                           | 6510                                                            | 7 (2013)         |
| TiO <sub>2</sub> | MoS <sub>2</sub> -RGO | UV-Vis (Xe) 350 W         | Ethanol                        | 2066                                                            | 8 (2012)         |
| TiO <sub>2</sub> | NiO                   | UV-Vis (Hg) 300 W         | Methanol                       | 813                                                             | 9 (2005)         |

<sup>a</sup> H: halogen lamp, Xe: xenon lamp, Hg: mercury lamp.

<sup>b</sup> TEOA: triethanolamine.

**Table S2. Compositions of the solutions for hydrothermal reaction of porous TiO<sub>2</sub> hierarchical microspheres synthesized under different conditions**

| Sample               | TTIP<br>(g) | Volume<br>ratio of<br>HCl:EG | CTAB<br>(g) | H <sub>2</sub> O<br>(mL) | Average diameters<br>of the constituent<br>units<br>(nm) |
|----------------------|-------------|------------------------------|-------------|--------------------------|----------------------------------------------------------|
| TiO <sub>2</sub> -15 | 0.6         | 7:5                          | 0.5         | 2.5                      | 15                                                       |
| TiO <sub>2</sub> -10 | 0.6         | 7:21                         | 0.5         | 2.5                      | 10                                                       |
| TiO <sub>2</sub> -5  | 0.6         | 7:35                         | 0.5         | 2.5                      | 5                                                        |

**Table S3. Surface analysis data**

| Sample               | Specific surface area (m <sup>2</sup> g <sup>-1</sup> ) <sup>a</sup> | Average pore size (nm) <sup>b</sup> | Pore volume(cm <sup>3</sup> g <sup>-1</sup> ) |
|----------------------|----------------------------------------------------------------------|-------------------------------------|-----------------------------------------------|
| TiO <sub>2</sub> -15 | 72.317                                                               | 5.0                                 | 0.087                                         |
| TiO <sub>2</sub> -10 | 111.147                                                              | 4.9                                 | 0.122                                         |
| TiO <sub>2</sub> -5  | 216.607                                                              | 3.8                                 | 0.241                                         |

<sup>a</sup> Specific surface area was calculated from the linear part of BET plot.

<sup>b</sup> Average pore diameter was estimated.

**Table S4. Photocatalytic activities of the samples**

| Samples              | H <sub>2</sub> activity<br>(mmol g <sup>-1</sup> h <sup>-1</sup> ) | QE<br>(%) |
|----------------------|--------------------------------------------------------------------|-----------|
| P25                  | 18.94                                                              | 14.59     |
| TiO <sub>2</sub> -15 | 12.38                                                              | 9.59      |
| TiO <sub>2</sub> -10 | 14.33                                                              | 11.05     |
| TiO <sub>2</sub> -5  | 23.74                                                              | 18.34     |

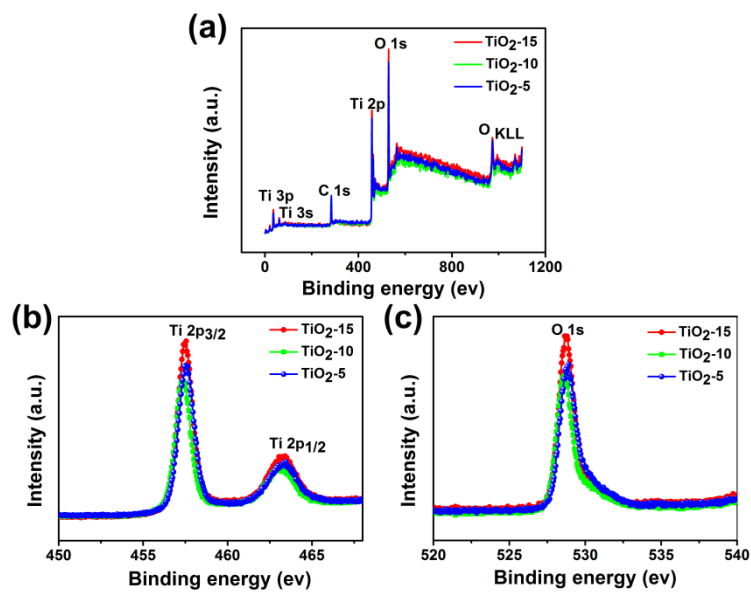

**Figure S1.** XPS spectra of TiO<sub>2</sub>-15, TiO<sub>2</sub>-10 and TiO<sub>2</sub>-5; (a) showing the three characteristic peaks of Ti, O and C of them, (b) and (c) showing the two characteristic peaks of Ti and O.

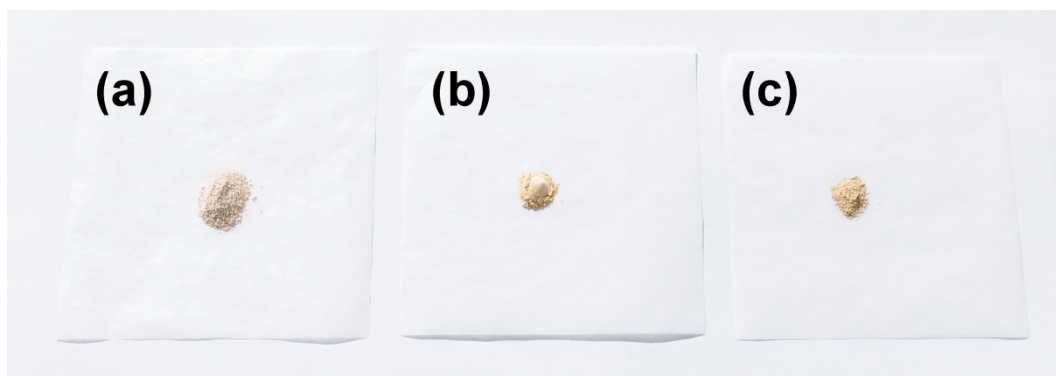

**Figure S2.** The photograph of all the products: (a) TiO<sub>2</sub>-15, (b) TiO<sub>2</sub>-10; (c) TiO<sub>2</sub>-5.

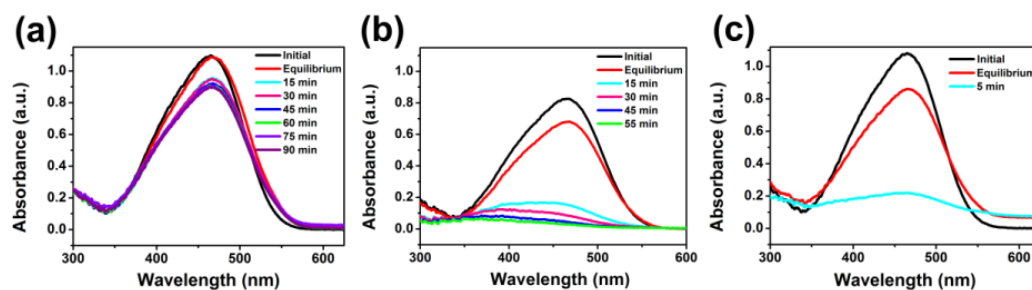

**Figure S3.** Photocatalytic degradation of MO under UV-visible light for 0.08 g, (a) TiO<sub>2</sub>-15, (b) TiO<sub>2</sub>-10, (c) TiO<sub>2</sub>-5 as photocatalyst. After 90 min 18.5% of the MO has been degraded for TiO<sub>2</sub>-15, after 15 min 80% of the

MO has been degraded for TiO<sub>2</sub>-10, but only after 5 min 80% of the MO has been degraded for TiO<sub>2</sub>-5.

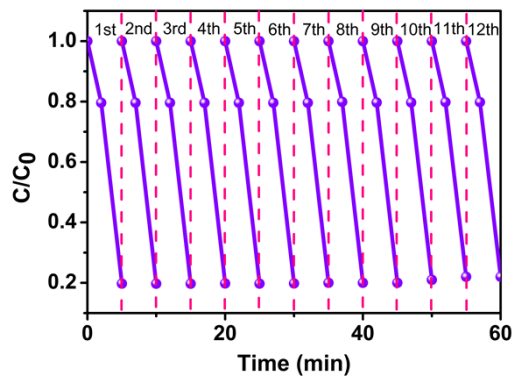

**Figure S4.** Cycling runs in photocatalytic degradation of MO in the presence of TiO<sub>2</sub>-5 under UV-visible light.

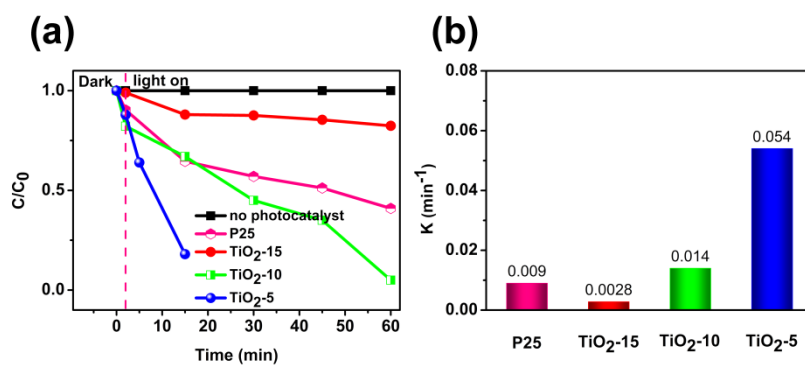

**Figure S5.** (a) and (b) Photocatalytic degradation of phenol under UV-visible light of P25, TiO<sub>2</sub>-15, TiO<sub>2</sub>-10 and TiO<sub>2</sub>-5 for 0.08 g, respectively: (a) C/C<sub>0</sub> of them and without photocatalyst; (b) First-order rate constant k (min<sup>-1</sup>) of them.

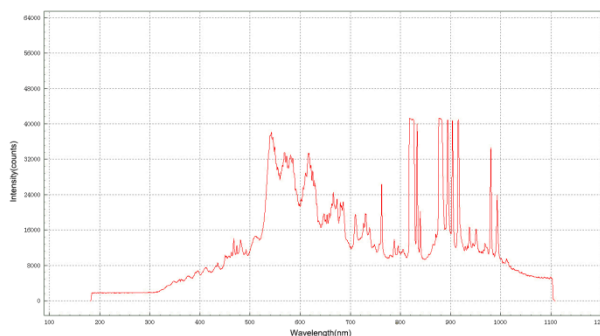

**Figure S6.** The UV-Vis spectra of 300 W Xenon lamp.

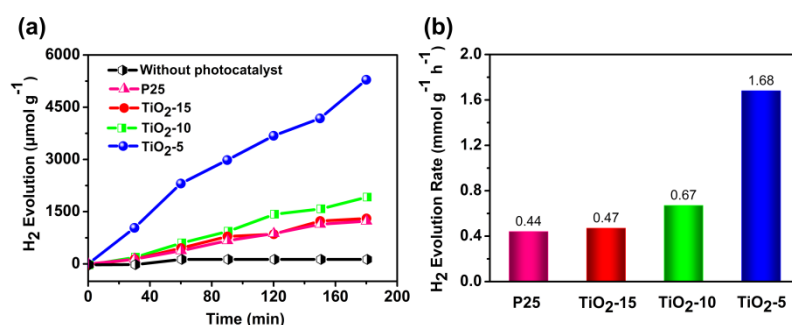

**Figure S7.** Photocatalytic generation of H<sub>2</sub> under UV-visible light irradiation for them: (a) Time evolution of photocatalytic generation of H<sub>2</sub> without Pt for the samples and without catalyst; (b) Comparison of H<sub>2</sub> evolution activities of them.

## References

- 1 P. D. Tran, L. F. Xi, S. K. Batabyal, L. H. Wong, J. Barber and J. S. C. Loo, Enhancing the photocatalytic efficiency of TiO<sub>2</sub> nanopowders for H<sub>2</sub> production by using non-noble transition metal co-catalysts, *Phys. Chem. Chem. Phys.*, 2012, 14, 11596.
- 2 T. Sreethawong and S. Yoshikawa, Comparative investigation on photocatalytic hydrogen evolution over Cu-, Pd-, and Au-loaded mesoporous TiO<sub>2</sub> photocatalysts, *Catal. Commun.*, 2005, 6, 661.
- 3 K. Yamaguti and S. Sato, Photolysis of water over metallized powdered titanium dioxide, *J. Chem. Soc., Faraday Trans. 1*, 1985, 81, 1237.
- 4 S. Xu and D. D. Sun, Significant improvement of photocatalytic hydrogen generation rate over TiO<sub>2</sub> with deposited CuO, *Int. J. Hydrogen Energy*, 2009, 34, 6096.
- 5 H. F. Dang, X. F. Dong, Y. C. Dong, Y. Zhang and S. Hampshire, TiO<sub>2</sub> nanotubes coupled with nano-Cu(OH)<sub>2</sub> for highly efficient photocatalytic hydrogen production, *Int. J. Hydrogen Energy*, 2013, 38, 2126.
- 6 J. G. Yu, Y. Hai and B. Cheng, Enhanced Photocatalytic H<sub>2</sub>-Production Activity of TiO<sub>2</sub> by Ni(OH)<sub>2</sub> Cluster Modification, *J. Phys. Chem. C*, 2011, 115, 4953.
- 7 B. Chai, T. Y. Peng, X. H. Zhang, J. Mao, K. Li and X. G. Zhang, Synthesis of C<sub>60</sub>-decorated SWCNTs (C<sub>60</sub>-d-CNTs) and its TiO<sub>2</sub>-based nanocomposite with enhanced photocatalytic activity for hydrogen production, *Dalton Trans.*, 2013, 42, 3402.

- 8 Q. J. Xiang, J. G. Yu and M. Jaroniec, Synergetic effect of MoS<sub>2</sub> and graphene as cocatalysts for enhanced photocatalytic H<sub>2</sub> production activity of TiO<sub>2</sub> nanoparticles, *J. Am. Chem. Soc.*, 2012, 134, 6575.
- 9 T. Sreethawong, Y. Suzuki and S. Yoshikawa, Photocatalytic evolution of hydrogen over mesoporous TiO<sub>2</sub> supported NiO photocatalyst prepared by single-step sol–gel process with surfactant template, *I Int. J. Hydrogen Energy* 2005, 30, 1053.
